## 1 **A comprehensive manually-curated Compendium of Bovine Transcription Factors**

2 Marcela M de Souza<sup>1,2</sup>, Juan M Vaquerizas<sup>3</sup>, Adhemar Zerlotini<sup>4</sup>, Ludwig Geistlinger<sup>2</sup>, Benjamín  
3 Hernández-Rodríguez<sup>3</sup>, Polyana C Tizioto<sup>5</sup>, Jeremy F Taylor<sup>6</sup>, Marina IP Rocha<sup>1</sup>, Wellison JS  
4 Diniz<sup>1</sup>, Luiz L Coutinho<sup>7</sup>, Luciana CA Regitano<sup>2</sup>

5 <sup>1</sup>Federal University of São Carlos, São Carlos SP Brazil

6 <sup>2</sup>Embrapa Pecuária Sudeste, São Carlos SP Brazil

7 <sup>3</sup>Max Planck Institute for Molecular Biomedicine, Münster 48149 Germany

8 <sup>4</sup>Embrapa Informática Agropecuária, Campinas SP Brazil

9 <sup>5</sup>NGS Genomic Solutions, Piracicaba SP Brazil

10 <sup>6</sup>Division of Animal Science, University of Missouri, Columbia MO 65211-5300 USA

11 <sup>7</sup>University of São Paulo, Piracicaba SP Brazil

12

13

### 14 **ABSTRACT**

15 Transcription factors (TFs) are pivotal regulatory proteins that control gene expression in a  
16 context-dependent and tissue-specific manner. In contrast to human, where comprehensive  
17 curated TF collections exist, bovine TFs are only rudimentary recorded and characterized. In  
18 this article, we present a manually-curated compendium of 865 sequence-specific DNA-binding  
19 bovine TFs, which we analyzed for domain family distribution, evolutionary conservation, and  
20 tissue-specific expression. In addition, we provide a list of putative transcription cofactors  
21 derived from known interactions with the identified TFs. Since there is a general lack of  
22 knowledge concerning the regulation of gene expression in cattle, the curated list of TF should  
23 provide a basis for an improved comprehension of regulatory mechanisms that are specific to  
24 the species.

25

### 26 **INTRODUCTION**

27 Regulation of gene expression is of essential importance for all living species as it  
28 controls specific developmental stages and the response to prevailing environmental conditions.  
29 The regulation of gene expression also contributes to phenotypic diversity within and between  
30 species (1–3).

31 Among the factors regulating gene expression are proteins known as transcription  
32 factors (TFs) that act as initiators of transcription and this class of proteins has been well  
33 studied in model organisms. TFs act by recognizing and binding to the regulatory regions of  
34 their target genes and can either positively or negatively regulate gene expression (4, 5). TFs  
35 bind to specific sequences (motifs) via their DNA-binding domain (DBD) (6). A variety of  
36 databases exist that contain collections of protein domain, including Pfam (7), Prosite (8), Smart  
37 (9), and Superfamily (10). The InterPro consortium (11) has merged information from these  
38 sources and additional 10 databases into entries for protein domains and families. Using the  
39 InterProScan tool (12), these domains can be searched for their presence and locations within  
40 any assembled genome.

41 TFs are key proteins in the regulation of important biological processes, for example,  
42 embryonic development (13) or tissue differentiation (14). Furthermore, other proteins can  
43 interact with TFs to regulate transcription (15). These proteins are called transcription cofactors  
44 (TcoFs) and they can form complexes with TFs to fine-tune the precision and complexity of  
45 transcriptional regulation.

46 There have been many studies that investigated human and mouse TFs, their binding  
47 domains, target genes, and interactions with other proteins. This has resulted in comprehensive

48 collections of human and mouse TFs (16–23). Among these resources, the human TF census  
49 built by Vaquerizas *et al.* (20) includes 1,391 manually-curated human TFs. Additional  
50 databases comprise, Animal TFDB (22), DBD (21), and Cis-Bp (23), which provide large  
51 collections for 65, 131 and 700 different species, respectively. Animal TFDB also provides a list  
52 of TcoFs as derived from known with TFs for each species.

53 Despite this, knowledge about bovine DNA-protein and protein-protein interactions is  
54 limited; TF databases that provide information for the *Bos taurus* exclusively contain TFs that  
55 were predicted *in silico* based on data from human and mouse. Although new high-throughput  
56 technologies have greatly contributed to a better understanding of gene regulation in cattle,  
57 there is currently no curated list of bovine TFs, and all studies in livestock to date have used the  
58 human TF list (24–26). Consequently, the development of a compendium of bovine TFs and  
59 TcoFs will improve insights into the regulation of gene expression in cattle, reducing  
60 opportunities for error caused by humanizing livestock data.

61 We manually curated a compendium of bovine TFs as derived from the human TF  
62 census from Vaquerizas *et al.* (20). We also generated a list of putative TcoFs that have been  
63 reported to physically interact with the identified bovine TFs. We are further complementing  
64 these collections by analyzing TF evolution, domain family distribution and expression in 14  
65 bovine tissues.

66

## 67 **MATERIALS AND METHODS**

### 68 **Identification of bovine TF genes**

69 We adapted the approach of Vaquerizas *et al.* (20) by using the property of TFs to bind to DNA  
70 in a sequence-specific manner to identify the repertoire of bovine TFs in four main steps (Figure  
71 1).

72 *Updating the human reference TF repertoire.* Vaquerizas *et al.* (20) manually curated a list of  
73 DNA-binding domains (DBDs), which we updated based on new functional evidence. In the  
74 compendium of Vaquerizas *et al.* (20), high-confidence TFs were divided into four classes: “a” -  
75 genes that probably encode TFs given experimental evidence for regulatory function in a  
76 mammalian organism; “b” - genes that probably encode TFs given an equivalent protein  
77 arrangement as for a TF in “a” class; “c” - genes that may potentially encode TFs, but for which  
78 there was no functional evidence; and “other” - genes containing unclassified DNA-binding  
79 domains obtained from sources such as TRANSFAC (16). Genes known not to be TFs were  
80 classified as “x”. Furthermore, we manually inspected TFs initially identified in classes “b” and  
81 “c” by Vaquerizas *et al.* (20) to determine if new experimental evidence could be found in the  
82 literature allowing their reclassification into “a” class.

83 *Identification of reliable DBDs.* In the second step (Figure 1), we queried high-confidence TFs  
84 (“a” and “b” classes) against three additional human TF databases DBD (21), AnimalTFDB (22)  
85 and Cis-Bp (23) to identify probable DBDs that are missing from the Vaquerizas *et al.* (20) list.  
86 We first removed from these databases genes classified by Vaquerizas *et al.* (20) as known not  
87 to be TFs (“x” class). DBDs common to the three additional databases but that were not  
88 contained in Vaquerizas *et al.* (20), were checked for their description and functions reported in  
89 the literature. After that, we selected only those domains with a sequence-specific DNA-binding  
90 function and that were not found in genes with molecular functions other than transcription. To  
91 find new DBDs which may not be present in human, we next applied the same methodology for  
92 mouse entries within these three TF databases. We used the InterPro (11) nomenclature for  
93 DBDs.

94 *Identification of probable bovine TFs.* Annotated bovine genes and their InterPro domains from  
95 the Ensembl database (release 82) were extracted using BioMart (27). We retained all bovine  
96 genes that had at least one DBD contained within the list of reliable DBDs.

97 *Manual curation.* To remove likely false positives, we compared the predicted bovine TFs with  
98 the human counterparts in Vaquerizas *et al.* (20). Ensembl Compara (version 89) was accessed  
99 to obtain the human orthologues for all predicted bovine TFs. Bovine genes with one-to-one or  
100 one-to-many human TF orthologues of class “a” or “b” in Vaquerizas *et al.* (20) list were  
101 selected. We manually inspected all remaining probable TFs by examining the associated  
102 literature and selecting those with experimental evidence for either the human or mouse  
103 orthologue functioning as a TF. Accordingly selected bovine TFs were classified as “a” class. To  
104 ensure that they possessed the same function as their human orthologues (one-to-one or one-  
105 to-many) we manually and computationally compared the domain arrangement of each bovine  
106 TF against its orthologues, retaining only those with significant domain alignments using the  
107 algorithm described by Terrapon *et al.* (28).

108 Finally, bovine TFs without a human or mouse orthologue were assigned to a new class (“y”  
109 class). To check whether those could be bovine-specific TFs, we aligned their DNA sequence to  
110 the human genome using Blast ([http://www.ensembl.org/Bos\\_taurus/Tools/Blast](http://www.ensembl.org/Bos_taurus/Tools/Blast)). For those  
111 showing high sequence similarities to a human gene, we applied a domain arrangement  
112 analysis. Resulting bovine genes with a high domain arrangement similarity to a human class  
113 “a” or “b” TF were classified as “b”. The remaining predicted bovine TFs without human  
114 orthologues were assigned as “y”. Finally, predicted bovine TFs in “y” class included genes  
115 without human orthologues but that possessed reliable DBDs. However, no regulatory function  
116 was found for them in the literature.

117

## 118 **TF Homology**

119 The evolutionary history of predicted bovine TFs was analyzed using phylogenetic relationships  
120 from Ensembl Compara. Orthology information between 21 vertebrates species was accessed  
121 using the biomaRt package (29).

122

## 123 **Structural features of TFs**

124 TFs were classified into family groups based on the structure of their DBDs using the same  
125 classification scheme as used by Vaquerizas *et al.* (20). TFs with more than one DBD were  
126 classified into each of the respective families, and families with less than five members were  
127 classified as “other”.

128

## 129 **Identification of bovine TcoF**

130 The TcoF repertoire was built by adapting the approach of Schaefer *et al.* (30). First, protein-  
131 protein interactions were downloaded from IntAct (accessed January 2017) (31). Next, proteins  
132 physically interacting with at least one predicted bovine TF were considered as putative TcoFs.  
133 Interactions between two TFs were excluded. We filtered for interaction types MI:0195 (covalent  
134 binding), MI:0407 (direct interaction) or MI:0915 (physical association).

135 Putative bovine TcoFs were classified according to their Gene Ontology (GO) annotation. We  
136 used the human GO annotation since most bovine annotations are predicted and are not based  
137 on experimental evidence from cattle. We required candidate TcoFs to be: i) located in the

138 nucleus (cellular component GO:0005634) and, ii) involved in transcriptional regulation. For the  
139 latter, we required molecular functions to include GO:0003713, GO:0003712, GO:0003714,  
140 GO:0001221, GO:0001222, GO:0001223, GO:0033613, or GO:0070491 and biological process  
141 to include GO:0006351, GO:0045892, GO:0045893, GO:0006355 or GO:0009299. The Entries  
142 in the bovine compendium were classified based on GO evidence types. When divided into  
143 experimental evidence (EXP, IDA, IMP, IGI, IEP and IPI codes) and non-experimental evidence  
144 (all other evidence codes), TcoFs were accordingly classified as “High-confidence” or  
145 “Hypothetical,” respectively.

146

#### 147 **Tissue-specific expression of bovine TFs and TcoFs**

148 Expression of bovine TFs and TcoFs in 14 tissues was examined using RNA-seq data from the  
149 L1 Hereford cow Dominette 01449 described in Whitacre *et al.* (32). Tissues included in the  
150 analysis were ampulla, white blood cells, cerebral cortex, endometrium, caruncular regions  
151 contralateral (car con) and ipsilateral (car ips) to the corpus luteum, gallbladder, heart,  
152 jejunum, kidney, liver, mesenteric lymph nodes, pons, semitendinosus muscle, and spleen.

153 Read alignment to UMD3.1 reference assembly was performed using TopHat (33) as described  
154 by Tizioto *et al.* (34). In brief, the aligned reads were individually assembled into a parsimonious  
155 set of transcripts for each sample. StringTie (35) was used to estimate transcript abundances as  
156 Fragments Per Kilobase of exon per Million fragments mapped (FPKM), a procedure that  
157 normalizes transcript expression for transcript length and the total number of sequence reads  
158 per sample. TF-TcoF co-expression across tissues was analyzed based on simultaneous  
159 presence (FPKM > 0) or absence TF-TcoF pairs.

160

## 161 **RESULTS**

162 We curated a compendium of bovine TFs by adapting the approach of Vaquerizas *et al.* (20) in  
163 four essential steps (Figure 1).

164 First, we updated the human TF reference repertoire by inspecting genes classified as “b” or “c”  
165 by Vaquerizas *et al.* (20). See Material and Methods for definition of these evidence classes.  
166 We found new evidence for transcriptional activity of 86 b-class genes and eight c-class genes,  
167 which we accordingly re-classified as “a” (Table S1).

168 In the second step, we extended the set of high-confidence DBDs from Vaquerizas *et al.* (20) by  
169 analysing human and mouse data from three additional TF databases (DB database (21),  
170 AnimalTFBD (22) and Cis-Bp (23)). When analyzing human TF data, we found 26 genes that  
171 were common to the three additional databases, but that were absent from Vaquerizas *et al.*  
172 (20) (Figure S1a). We inspected the DBDs contained in these genes and found zinc finger  
173 C2H2-type/integrase DNA-binding domain (IPR013087), which we accordingly added to the set  
174 of high-confidence DBDs. When analysing mouse TF data in the three additional databases, we  
175 found 1,162 TFs in common (Figure S1b). These TFs contained five novel genes with reliably  
176 identified DBDs (IPR001523, IPR008122, IPR008123, IPR017114, and IPR007087) that were  
177 also added to the list of high-confidence DBDs. The final list (Table S2) included 133 high-  
178 confidence DBDs (corresponding to InterPro entries), which were composed by 76 domains and  
179 57 family domains.

180 In the third step, we identified probable bovine TFs by searching the collected DBDs in 24,616  
181 bovine genes of the UMD 3.1 genome assembly in Ensembl, extracting 1,525 genes which  
182 contained at least one high-confidence DBD.

183 In the final manual curation step, we obtained human orthologues of the 1,525 predicted bovine  
184 TFs from Ensembl Compara. We then removed (i) genes for which human orthologues were  
185 classified “c” by Vaquerizas *et al.* (20), (ii) genes not having transcriptional function, and (iii)  
186 pseudogenes. This resulted in 1,306 predicted bovine TFs. From these, we further considered  
187 putative bovine TFs with orthologues (one-to-one and one-to-many) to human TFs classified as  
188 “a”, “b” or “other” by Vaquerizas *et al.* (20). For the remaining genes, for which human  
189 orthologues were not present in Vaquerizas *et al.* (20), we analyzed each case for evidence of  
190 transcriptional activity in the literature. From this analysis, we recovered four genes that were  
191 reclassified as “a” class because we found experimental evidence for TF function for their  
192 human or mouse orthologues in the literature. To increase confidence, we verified whether the  
193 human orthologues (one-to-one or one-to-many) possessed the same domain arrangement,  
194 thereby ensuring that the genes had the same function in the species analyzed. Of the 1,022  
195 predicted bovine TFs analyzed in this step, we found that 865 had identical or highly similar  
196 domain arrangements. However, 62 had considerable domain arrangement discrepancies  
197 between species. These diverged predicted bovine TFs were excluded from the TF list and  
198 classified as “c” along with 95 genes for which we were unable to analyze domain arrangement.

199 For bovine genes with confidence DBDs but no human orthologues (“y” class), we searched the  
200 sequences with BLAST against the human genome assembly GRCh38. We excluded genes  
201 with high sequence similarity as well as similar domain arrangement to human genes classified  
202 as having functions other than transcription by Vaquerizas *et al.* (20). A total of five genes  
203 possessed similarity to genes classified as “a” or “b” by Vaquerizas *et al.* (20) and were  
204 classified as “b” in the bovine TF repertoire (Table S3). The remaining 24 genes, without human  
205 orthologues and that had reliable DBDs identified but no regulatory function described, were  
206 retained in the “y” class (Table S4).

207 Finally, after analysis of human/mouse orthology, protein function, experimental evidence,  
208 sequence similarity, and domain arrangement, the final list of high-confidence bovine TFs  
209 contained 865 genes (Table S4 – “a” and “b” classes).

210 *Comparison to existing bovine TF databases.* We next compared the TFs contained in our  
211 bovine TF compendium to those from three existing TF databases (DB database (21),  
212 AnimalTFBD (22) and Cis-Bp (23)). This revealed that the majority of TFs in our compendium,  
213 83.2% (N=720), were also annotated as bovine TFs in the three databases. Additional 92 TFs  
214 (10.6 %) were present in two, and another 36 (4.2 %) were in only one of the existing databases  
215 (Figure S2). Seventeen TFs were exclusively present in our compendium. Of these, 11 were “a”  
216 class, with experimental evidence for their TF function, and six were in “b” class. By considering  
217 genes that were present within at least one of the alternative sets but that were not in our set,  
218 we found evidence for false positive TFs in the above mentioned databases. Of these, 92 had  
219 been excluded from our repertoire because they were classified as having other activity than  
220 transcriptional by Vaquerizas *et al.* (20) and another 35 in “a” or “b” classes in Vaquerizas *et al.*  
221 (20) had domain arrangements that differed from their human/mouse orthologues. Moreover,  
222 genes in “a” or “b” classes for which we were unable to perform domain analyses or genes  
223 classified as “c” by Vaquerizas *et al.* (20) were included in the alternative TF databases. Genes  
224 in these groups require experimental evidence to enable their accurate classification regarding  
225 TF functionality.

226

## 227 **TF homology**

228 Using the phylogenetic relationships retrieved from Ensembl Compara, we investigated the  
229 presence or absence of orthologues of the 865 predicted bovine TF genes across 21 eukaryotic  
230 genomes (Figure 3). We found genes with similar patterns of presence or absence across the



231 species and grouped them in accordance to their conservational similarity. There were 59 (6.8%  
232 of the total 865 TFs) TFs that were present only in mammals and another 55 (6.35%) were  
233 predominantly found in mammals. Additional 202 (23.35%) TFs predominantly found in  
234 vertebrates. From the metazoa TF cluster, (N = 467; 54%), 83 were found in all analyzed  
235 species. Finally, 82 (9.5%) TFs were found in most eukaryotes of which, 15 (1.7%) were present  
236 in all analyzed species. Interestingly, four TFs were shared by only two species, and 11 TFs  
237 had no orthologues in either human or mouse.

238 Predicted bovine TFs in the “y” class, which have no human orthologues or evidence of  
239 transcriptional function, were also analyzed (Figure S3). We found eight TFs that were present  
240 in *Bos taurus* and only one other species, of which two were exclusive to ruminants.

241

#### 242 **Structural features of bovine TFs**

243 We grouped the bovine TFs according to their DBD structure, and observed that 76.84% of the  
244 TFs belong to four families: C2H2 zinc-finger (n = 596), homeodomain (n = 412), bZip (n = 83)  
245 or helix-loop-helix (n = 77). As shown in Figure 2, the distribution of bovine TFs among DBD  
246 families was very similar to the distribution of human TF DBD families obtained by Vaquerizas *et*  
247 *al.* (20).

248

#### 249 **Identification of bovine TcoFs**

250 We extracted protein interaction data from the IntAct database for all proteins that interacted  
251 with the bovine TFs, which resulted in 31,799 interactions. From those, we selected only the  
252 16,608 physical, 1,241 direct and one covalent-binding protein interactions. We inspected each  
253 potential TcoF by accessing their GO annotations, to determine if they were located in the  
254 nucleus and were annotated to a biological process and molecular function related to  
255 transcription. We found 3,842 interacting proteins that were located in the nucleus and 3,590  
256 with GO biological processes, of which 1,558 had GO molecular functions related to  
257 transcription. Removing TF-TF interactions yielded 3268 TF-TcoFs interactions of 501 TFs  
258 interacting with 782 TcoFs. These TcoFs were classified based on their GO evidence class  
259 (Table S5). The highest-confidence class comprised 248 TcoFs with experimental evidence for  
260 nuclear localization and molecular function related to transcription. The remaining 534 genes  
261 were classified into three groups, called as hypothetical, based on whether they had  
262 experimental evidence for nuclear localization, transcriptional function or neither. This resulted  
263 in the groups hypothetical I, II and III containing respectively, 52 proteins with experimental  
264 evidence for transcription function but no experimental evidence for nuclear localization, 214  
265 proteins with experimental evidence for nuclear localization but no experimental evidence for  
266 transcription function, and 267 proteins with no experimental evidence for nuclear localization or  
267 transcriptional function.

268

#### 269 **Tissue-specificity of bovine TF and TcoF expression**

270 We next analyzed the expression of the identified TFs and TcoFs as measured with RNA-seq in  
271 14 bovine tissues. Of the 865 TFs and 781 TcoFs in our compendium, 681 (78.7 %) and 608  
272 (77.8 %) were expressed in at least one of the studied tissues, respectively. They were  
273 represented by 714 TF (Figure 4A; Table S6) and 635 TcoF isoforms (Figure 4B; Table S7).

274 We found considerable variation in TF presence across tissues, ranging from 326 in white blood  
275 cells to over 500 TFs expressed in spleen, heart, endometrium sampled from caruncular  
276 regions contralateral (car con), lymph nodes, gallbladder, and ampulla. Spleen had the largest  
277 number of expressed TFs (N = 541).

278 Approximately 22.9% of the TFs analyzed were expressed in all 14 tissues, whereas less than  
279 10% were found to be expressed in only one tissue. The Y-box binding protein 1 (*YBX1*) was the  
280 most widely expressed TF across all of the tissues, ranging from an FPKM of 18.96 in the  
281 ampulla to 882.70 in the kidney. Other TFs expressed in all tissues included *ZFP36* ring finger  
282 protein like 1 (*ZFP36L1*), TSC22 domain family member 1 (*TSC22D1*), zinc finger protein 24  
283 (*ZNF24*), X-box binding protein 1 (*XBP1*), DR1 associated protein 1 (*DRAP1*), FOS like 2, AP-1  
284 transcription factor subunit (*FOSL2*) and YY1 transcription factor (*YY1*), which all had an average  
285 FPKM of at least 30 across tissues. T-box 20 (*TBX20*), nuclear factor, erythroid 2 (*NFE2*) and T-  
286 box, brain 1 (*TBR1*) were exclusively expressed in a single tissue and at high levels (120.83,  
287 58.28 and 22.92 FPKM, in kidney, blood and ampulla respectively).

288 TcoFs were more broadly expressed than TFs across tissues (Figure S4), with 83.4% of TcoF  
289 expressed in more than ten tissues in contrast to only 57.8% of TFs. We also found that 7% of  
290 TcoFs but 22.3% of TFs were expressed in at most three tissues. Jejunum had the smallest  
291 number of expressed TcoF (N=406) and fewer than 500 TcoFs were expressed in white blood  
292 cells and kidney. The other eleven analyzed tissues had between 513 and 567 TcoFs  
293 expressed. Heart and spleen (N = 567) had the largest numbers.

294 We found 40.8% of the TcoFs for which the expression was analyzed to be expressed in all  
295 analyzed tissues. The 40S ribosomal protein S3 (*RPS3*) gene was highly expressed in all  
296 tissues with an average abundance of expression 617.56 FPKM and ranging from 174.27  
297 FPKM in ampulla to 1,426.03 FPKM in white blood cells. Six other TcoFs were expressed in all  
298 tissues and with an average FPKM of 100, and included high mobility group protein B1  
299 (*HMGB1*), 60S ribosomal protein L6 (*RPL6*), prothymosin alpha (*PTMA*), heat shock factor  
300 binding protein 1 (*HSBP1*), nucleophosmin (*NPM1*) and elongation factor 1-delta (*EEF1D*).  
301 Ankyrin repeat domain-containing protein 1 (*ANKRD1*), and cysteine and glycine-rich protein 3  
302 (*CSRP3*) were expressed in only three tissues but had the greatest expression of all TcoFs  
303 (FPKM of 6,010.14 and 2,863.34 in kidney, 442 and 483.94 in liver, and 2.46 and 0.94 in car  
304 con, respectively). Relatively, few TcoFs (2.67%) were exclusively expressed in a single tissue  
305 and not at high levels. We found chromobox protein homolog 3 (*CBX3*) with a FPKM of 19.47 in  
306 spleen, and the remaining TcoFs expressed in a single tissue had FPKMs of less than 6.

307 *TF-TcoF simultaneous expression.* Checking the expression of 2,514 TF-TcoF interaction pairs,  
308 we found that 1,937 (77%) TF-TcoF pairs were coexpressed in at least one tissue, from which  
309 278 (11%) were coexpressed in all tissues, and 998 (39.7 %) were coexpressed in more than  
310 ten tissues (Figure 5; Table S8). We consider a TF-TcoF pair to be coexpressed when both  
311 genes were simultaneously expressed in at least one tissue.

312 We found 385 TFs coexpressed with 577 TcoFs. The TF with the most interacting TcoFs,  
313 Tumor protein 53 (*TP53*), was coexpressed with 67 of its interacting TcoFs (out of 90, 74.44%).  
314 The TcoF with the most interacting TFs, Lysine demethylase 1A (*KDM1A*), was coexpressed  
315 with 44 of its interacting TFs (95.65%). The most widely-expressed TcoF, *RPS3* coexpressed  
316 with NF-kappaB transcription factor p65 subunit (*RELA*) and *TP53* in all 14 tissues, and with  
317 nuclear factor kappa B subunit 1 (*NFKB1*) in 13 tissues.

318

319 **DISCUSSION**

320 Knowledge of the existing functional TFs in cattle is of essential importance for studying gene  
321 regulatory processes as well as interpreting regulatory implications from high-throughput gene  
322 expression data in livestock.

323 Faced with a lack of information concerning bovine TFs, previous studies (24–26) used the  
324 human TF list published by Vaquerizas *et al.* (20) to represent the bovine reference TF set  
325 which may lead to errors or oversights. With the availability of a specific bovine TF set, these  
326 issues should be minimized and additional insights can be expected in the field of gene  
327 regulation in the bovine.

328 We therefore generated a comprehensive manually-curated compendium of bovine TFs using  
329 the human TF census (20) as reference. After updating the human reference, we extended the  
330 contained set of DNA-binding domains and searched them in the *Bos taurus* genome sequence  
331 assembly. We thereby identified new bovine TFs that were not previously included in existing  
332 TF databases.

333 As existing bovine TF annotation largely relies on orthology transfer from human, it is important  
334 to note that we found a non-negligible fraction of human TFs identified by Vaquerizas *et al.* (20)  
335 for which the apparent bovine orthologue did not possess the same domain arrangement. As  
336 these differences may affect protein function, we excluded putative bovine TFs with predicted  
337 domain variation. This also demonstrates that orthology transfer alone is not sufficient for  
338 accurate bovine TF annotation. For example, the *IKZF2* gene is well described in human and  
339 mice as a TF (36) with suggested roles in the regulation of T cell function (36–38) and in the  
340 leukemogenesis of adult T-cell leukemia (38). In cattle, we did not find experimental evidences  
341 for TF function of *IKZF2* in the literature, and we further found *IKZF2* to have a different domain  
342 arrangement than the human orthologue. However, these differences could also partially be  
343 artifacts since the bovine assembly is an early-stage draft assembly while the human assembly  
344 is essentially complete. Whitacre *et al.* (32) predicted that 42% of bovine genes are either  
345 missing or misassembled in the UMD3.1 (32) assembly and this may have produced the domain  
346 differences that we found. Thus, we decided to classify these genes as “c” class until further  
347 information can be added in the literature and the assembly improved.

348 Our TF compendium also includes likely bovine TFs without a human or mouse orthologue (and  
349 which are thus missing when human TFs are adopted for bovine studies). For example, the  
350 gene *LOC509810*, which contains has the same domain arrangement of the human TF *ZNF211*  
351 (20), is known to only otherwise be present in sheep and swine. As we also found the gene  
352 expressed in 14 bovine tissues, further target studies are needed to clarify the function of this  
353 hypothetical TF.

354 When comparing our results to existing TF databases listing bovine TFs based on orthology  
355 transfer from human, the majority of TFs present in our compendium were also included in at  
356 least one of the existing TF databases. However, we found that these databases also listed  
357 bovine genes as TFs that were excluded from our compendium because of diverged domain  
358 arrangements relative to their human orthologues. These databases also listed genes with  
359 evidence for functions other than transcription such as *SETDB1* and *SETDB2* that are well-  
360 known histone methyltransferases (39, 40). While these genes are classified as TFs in all three  
361 the alternative databases, they were classified as not having TF function by Vaquerizas *et al.*  
362 (20) and, consequently, were also excluded from our compendium.

363 Our thorough manual curation of candidate TFs aims at a high-confidence bovine TF  
364 compendium. However, it is based on the currently still limited literature for gene regulation in  
365 cattle. This is reflected by the incorporated evidence classification scheme. This also allows to  
366 distinguish genes containing domains that were confidently predicted as being DNA-binding  
367 domains, but that lacked human TF orthologues with an identical domain arrangement. With



368 future studies on gene regulation in cattle, it will presumably become possible to determine if  
369 these genes are actually bovine TFs.

370 To characterize the identified bovine TFs, we checked the presence and distribution of domain  
371 families. Although, more recent classification of TF domain families are available in the literature  
372 (17), we adopted the same classification scheme as Vaquerizas *et al.* (20) to make a direct  
373 comparison possible. As in human (20) and mice (41), the most abundant domain family was  
374 C2H2 zinc-finger, followed by homeodomains. This was expected as both domain families are  
375 the most common across all eukaryotes, followed by the bZip family (42). C2H2 zinc-finger TFs  
376 are only present in eukaryotes (42), whereas homeodomain-containing TFs have also been  
377 found in fungi and plants (42).

378 The evolution of bovine TFs can be assumed to follow the same pattern as in other mammals  
379 (20, 42) as also observed in our results on bovine TF homology to other species. This pattern  
380 corroborates the idea that the occurrence of a new type of DBD overlaps with an increment in  
381 organismal complexity (43, 44). The notable differences observed for bovine TF orthologues in  
382 fungi and the other eukaryotes might can be explained by the evolution of domains such as  
383 bHLH (45) and homeodomains (46) after fungi and Metazoa had separated.

384 The emergence of new domains and their expansions probably enabled an increase in  
385 regulatory complexity. For example, Charoensawan *et al.* (42) found that DBD families IRF  
386 (interferon regulatory factor) and Churchill (related to neural development) were only present in  
387 vertebrates coinciding with the more complex immune and neural systems of vertebrates.  
388 Another major expansion occurred with the C2H2 zinc-finger, which is present in both branches  
389 of vertebrates and mammals (20, 47). According to Charoensawan *et al.* (42), DBD expansions  
390 have been greater in vertebrates than in invertebrates.

391 We further complemented the compendium by screening for putative transcription co-factors as  
392 derived from known interactions with the identified TFs. Using RNA-seq data for 14 tissues from  
393 the UMD3.1 reference assembly animal, we analyzed expression profiles for most of the bovine  
394 TFs and TcoFs, which suggested that 18% of the TFs and 31.75% of the TcoFs were  
395 ubiquitously expressed.

396 It has previously been shown that genes which evolved early tend to be expressed in more  
397 tissues of an organism, whereas more recently evolved genes tend to be tissue-specific in their  
398 expression (48). Our results agree with Vaquerizas *et al.* (20) who concluded that TFs do not  
399 follow this generalization of an evolutionary pattern of tissue-specific expression. We found TFs  
400 that were exclusively expressed in a single tissue but that had orthologues in all analyzed  
401 species. Conversely, we found expression of *LOC509810* in all tissues, but this gene apparently  
402 has orthologues only in sheep and pig as noted earlier.

403 Although TF expression analysis was limited to RNA-seq data for a single animal, genes found  
404 to be expressed in all analyzed tissues were predominantly housekeeping genes such as *YBX1*,  
405 *ZFP36L1*, *TSC22D1*, *DRAP1*, *FOSL2*, and *YY1*. This is in agreement with results of Harhay *et al.*  
406 (49). Despite the majority similarity with the Harhay *et al.* (49) results, *ZNF24* and *XBP1*  
407 which we also found to be expressed in all tissues, were not classified as housekeeping by  
408 them and, in the opposite, *TBX20*, *NFE2* and *TBR1* classified as housekeeping genes were  
409 expressed in only a single tissue here.

410 Due to the absence of biological replication and the limited range of tissues represented in the  
411 RNA-seq data, general conclusions about the tissue-specificity of TF expression cannot be  
412 draw. However, we often found tissue of TF expression to align well with Tf function. For  
413 example, *NEF2*, was found to only be expressed in white blood cells in accordance with its  
414 function in the maturation of erythroid cells (50, 51) which is delayed when *NEF2* is

415 overexpressed (50). Also, this TF was present in all mammals in our analysis of evolutionary  
416 conservation.

417 In comparison to TFs, TcoFs were apparently more widely-expressed. Around 80% of the  
418 TcoFs were expressed in more than ten tissues in contrast to only 57.7% of the TFs.  
419 Reciprocally, only 6.9% of the TcoFs were expressed in only one tissue as opposed to 23.7% of  
420 the TFs. This can be explained by the fact that each TF may interact with many TcoFs to  
421 initiate transcription and each TcoF can interact with several TFs. Further, we found the TF  
422 *TP53* annotated to interact with 90 TcoFs while the TcoF *KDM1A* was annotated to interact with  
423 46 different TFs.

424 The 40S ribosomal subunit component *RPS3* was the most broadly-expressed TcoF, in  
425 agreement with its function as a housekeeping gene (49, 52). We found this TcoF to be  
426 coexpressed with three TFs including *RELA* as reported before by Wan *et al.* (52). *RELA*, that  
427 was also expressed in all 14 tissues here, is a component of the NF- $\kappa$ B protein complex which  
428 act to control the transcription of target genes. The interaction between *RPS3* and *RELA*  
429 increases the binding of the transcriptional initiation complex to the DNA (52).

430 We also analyzed TF-TcoF coexpression to add experimental evidence to our predictions  
431 which were based on GO terms. We found, for example, that the TF *HIF1A*, that is responsive  
432 to hypoxia conditions, were expressed in all tissues as so its TcoF *VHL*. In normal conditions of  
433 oxygen, *VHL* binds to *HIF1A* preventing the transcription activation of hypoxia-inducible genes  
434 (53). However the coactivator *NOTCH1* was not coexpressed with *HIF1A* in any analyzed  
435 tissue, which agree with previous studies that the activation of *NOTCH1* transcription is  
436 increased in hypoxia condition, and this TcoF directly interact with *HIF1A* in hypoxia-inducible  
437 genes promoter (54). However, with no biological replicate we were unable to correlate  
438 coexpression profiles within each of the tissues for predicted TF-TcoF pairs.

439 In conclusion, our comprehensive curated bovine TF compendium represents a reliable source  
440 of information, with the potential to improve the sensitivity and specificity of studies on gene  
441 regulation in the bovine. As we also detailedly characterized the contained TFs with respect to  
442 protein structure, evolutionary conservation, and tissue-specific expression, we expect our TF  
443 compendium to also be a useful resource for studies on the functions and biological processes  
444 in which these TFs are involved. On the other hand, additional experimental evidence for the  
445 DNA-binding properties of the TFs in conjunction with additional information about their function  
446 and biological activities will also be essential to allow continuous updates and improvements of  
447 the compendium.

448

## 449 FUNDING

450 This work was supported by São Paulo Research Foundation [2012/20328-8, 2014/15183-6].

451

## 452 REFERENCES

- 453 1. Oleksiak, M.F., Churchill, G.A. and Crawford, D.L. (2002) Variation in gene expression within  
454 and among natural populations. *Nat Genet*, **32**, 261–266.
- 455 2. Townsend, J.P., Cavalieri, D. and Hartl, D.L. (2003) Population genetic variation in genome-  
456 wide gene expression. *Mol Biol Evol*, **20**, 955–963.
- 457 3. Wray, G.A., Hahn, M.W., Abouheif, E., Balhoff, J.P., Pizer, M., Rockman, M. V and Romano, L.A.  
458 (2003) The evolution of transcriptional regulation in eukaryotes. *Mol Biol Evol*, **20**, 1377–  
459 1419.

- 460 4. Heng, J.I.-T., Qu, Z., Ohtaka-Maruyama, C., Okado, H., Kasai, M., Castro, D., Guillemot, F. and  
461 Tan, S.-S. (2015) The Zinc Finger Transcription Factor RP58 Negatively Regulates Rnd2  
462 for the Control of Neuronal Migration During Cerebral Cortical Development. *Cereb.*  
463 *Cortex*, **25**, 806–816.
- 464 5. Heng, J.I.-T., Nguyen, L., Castro, D.S., Zimmer, C., Wildner, H., Armant, O., Skowronska-  
465 Krawczyk, D., Bedogni, F., Matter, J.-M., Hevner, R., *et al.* (2008) Neurogenin 2 controls  
466 cortical neuron migration through regulation of Rnd2. *Nature*, **455**, 114–8.
- 467 6. Latchman, D.S. (1997) Transcription factors: An overview. *Int. J. Biochem. Cell Biol.*, **29**,  
468 1305–1312.
- 469 7. Finn, R.D., Bateman, A., Clements, J., Coggill, P., Eberhardt, R.Y., Eddy, S.R., Heger, A.,  
470 Hetherington, K., Holm, L., Mistry, J., *et al.* (2014) Pfam: The protein families database.  
471 *Nucleic Acids Res.*, **42**.
- 472 8. Sigrist, C.J.A., De Castro, E., Cerutti, L., Cuche, B.A., Hulo, N., Bridge, A., Bougueleret, L. and  
473 Xenarios, I. (2013) New and continuing developments at PROSITE. *Nucleic Acids Res.*,  
474 **41**.
- 475 9. Letunic, I., Doerks, T. and Bork, P. (2015) SMART: Recent updates, new developments and  
476 status in 2015. *Nucleic Acids Res.*, **43**, D257–D260.
- 477 10. Wilson, D., Pethica, R., Zhou, Y., Talbot, C., Vogel, C., Madera, M., Chothia, C. and Gough, J.  
478 (2009) SUPERFAMILY - Sophisticated comparative genomics, data mining, visualization  
479 and phylogeny. *Nucleic Acids Res.*, **37**.
- 480 11. Finn, R.D., Attwood, T.K., Babbitt, P.C., Bateman, A., Bork, P., Bridge, A.J., Chang, H.Y.,  
481 Dosztanyi, Z., El-Gebali, S., Fraser, M., *et al.* (2017) InterPro in 2017-beyond protein family  
482 and domain annotations. *Nucleic Acids Res.*, **45**, D190–D199.
- 483 12. Jones, P., Binns, D., Chang, H.Y., Fraser, M., Li, W., McAnulla, C., McWilliam, H., Maslen, J.,  
484 Mitchell, A., Nuka, G., *et al.* (2014) InterProScan 5: Genome-scale protein function  
485 classification. *Bioinformatics*, **30**, 1236–1240.
- 486 13. Töhönen, V., Katayama, S., Vesterlund, L., Jouhilahti, E.-M., Sheikhi, M., Madisson, E.,  
487 Filippini-Cattaneo, G., Jaconi, M., Johnsson, A., Bürglin, T.R., *et al.* (2015) Novel PRD-like  
488 homeodomain transcription factors and retrotransposon elements in early human  
489 development. *Nat. Commun.*, **6**, 8207.
- 490 14. Zagozewski, J.L., Zhang, Q., Pinto, V.I., Wigle, J.T. and Eisenstat, D.D. (2014) The role of  
491 homeobox genes in retinal development and disease. *Dev Biol*, **393**, 195–208.
- 492 15. Nikolov, D.B. and Burley, S.K. (1997) RNA polymerase II transcription initiation: a structural  
493 view. *Proc. Natl. Acad. Sci. U. S. A.*, **94**, 15–22.
- 494 16. Wingender, E., Chen, X., Hehl, R., Karas, H., Liebich, I., Matys, V., Meinhardt, T., Prüss, M.,  
495 Reuter, I. and Schacherer, F. (2000) TRANSFAC: an integrated system for gene expression  
496 regulation. *Nucleic Acids Res.*, **28**, 316–319.
- 497 17. Wingender, E., Schoeps, T., Haubrock, M. and Dönitz, J. (2015) TFClass: A classification of  
498 human transcription factors and their rodent orthologs. *Nucleic Acids Res.*, **43**, D97–D102.
- 499 18. Harrison, S.C. (1991) A structural taxonomy of DNA-binding domains. *Nature*, **353**, 715–9.
- 500 19. Fulton, D., Sundararajan, S., Badis, G., Hughes, T., Wasserman, W., Roach, J. and Sladek, R.  
501 (2009) TFCat: the curated catalog of mouse and human transcription factors. *Genome*  
502 *Biol*, **10**, R29.
- 503 20. Vaquerizas, J.M., Kummerfeld, S.K., Teichmann, S.A. and Luscombe, N.M. (2009) A census of  
504 human transcription factors: function, expression and evolution. *Nat. Rev. Genet.*, **10**,  
505 252–263.

- 506 21. Wilson,D., Charoensawan,V., Kummerfeld,S.K. and Teichmann,S.A. (2008) DBD -  
507 Taxonomically broad transcription factor predictions: New content and functionality.  
508 *Nucleic Acids Res.*, **36**.
- 509 22. Zhang,H.M., Liu,T., Liu,C.J., Song,S., Zhang,X., Liu,W., Jia,H., Xue,Y. and Guo,A.Y. (2015)  
510 AnimalTFDB 2.0: A resource for expression, prediction and functional study of animal  
511 transcription factors. *Nucleic Acids Res.*, **43**, D76–D81.
- 512 23. Weirauch,M.T., Yang,A., Albu,M., Cote,A.G., Montenegro-Montero,A., Drewe,P.,  
513 Najafabadi,H.S., Lambert,S.A., Mann,I., Cook,K., *et al.* (2014) Determination and  
514 Inference of Eukaryotic Transcription Factor Sequence Specificity. *Cell*, **158**, 1431–1443.
- 515 24. Fortes,M.R.S., Reverter,A., Zhang,Y., Collis,E., Nagaraj,S.H., Jonsson,N.N., Prayaga,K.C.,  
516 Barris,W. and Hawken,R.J. (2010) Association weight matrix for the genetic dissection of  
517 puberty in beef cattle. *Proc. Natl. Acad. Sci. U. S. A.*, **107**, 13642–7.
- 518 25. Ramayo-Caldas,Y., Renand,G., Ballester,M., Saintilan,R. and Rocha,D. (2016) Multi-breed  
519 and multi-trait co-association analysis of meat tenderness and other meat quality traits in  
520 three French beef cattle breeds. *Genet. Sel. Evol.*, **48**, 37.
- 521 26. Ramayo-Caldas,Y., Ballester,M., Fortes,M.R.S., Esteve-Codina,A., Castelló,A.,  
522 Noguera,J.L., Fernández,A.I., Pérez-Enciso,M., Reverter,A. and Folch,J.M. (2014) From  
523 SNP co-association to RNA co-expression: novel insights into gene networks for  
524 intramuscular fatty acid composition in porcine. *BMC Genomics*, **15**, 232.
- 525 27. Smedley,D., Haider,S., Durinck,S., Pandini,L., Provero,P., Allen,J., Arnaiz,O., Awedh,M. and  
526 Baldock,R. (2015) The BioMart community portal: an innovative alternative to large,  
527 centralized data repositories. *Nucleic Acids Res.*, **43**, W589-98.
- 528 28. Terrapon,N., Weiner,J., Grath,S., Moore,A.D. and Bornberg-Bauer,E. (2014) Rapid similarity  
529 search of proteins using alignments of domain arrangements. *Bioinformatics*, **30**, 274–281.
- 530 29. Durinck,S., Spellman,P.T., Birney,E. and Huber,W. (2009) Mapping identifiers for the  
531 integration of genomic datasets with the R/Bioconductor package biomaRt. *Nat. Protoc.*, **4**,  
532 1184–91.
- 533 30. Schaefer,U., Schmeier,S. and Bajic,V.B. (2011) TcoF-DB: Dragon database for human  
534 transcription co-factors and transcription factor interacting proteins. *Nucleic Acids Res.*,  
535 **39**.
- 536 31. Orchard,S., Ammari,M., Aranda,B., Breuza,L., Briganti,L., Broackes-Carter,F.,  
537 Campbell,N.H., Chavali,G., Chen,C., Del-Toro,N., *et al.* (2014) The MIntAct project - IntAct  
538 as a common curation platform for 11 molecular interaction databases. *Nucleic Acids*  
539 *Res.*, **42**.
- 540 32. Whitacre,L.K., Tizioto,P.C., Kim,J., Sonstegard,T.S., Schroeder,S.G., Alexander,L.J.,  
541 Medrano,J.F., Schnabel,R.D., Taylor,J.F. and Decker,J.E. (2015) What's in your next-  
542 generation sequence data? An exploration of unmapped DNA and RNA sequence reads  
543 from the bovine reference individual. *BMC Genomics*, **16**, 1114.
- 544 33. Trapnell,C., Roberts,A., Goff,L., Pertea,G., Kim,D., Kelley,D.R., Pimentel,H., Salzberg,S.L.,  
545 Rinn,J.L. and Pachter,L. (2012) Differential gene and transcript expression analysis of  
546 RNA-seq experiments with TopHat and Cufflinks. *Nat. Protoc.*, **7**, 562–78.
- 547 34. Tizioto,P.C., Coutinho,L.L., Decker,J.E., Schnabel,R.D., Rosa,K.O., Oliveira,P.S.,  
548 Souza,M.M., Mourão,G.B., Tullio,R.R., Chaves,A.S., *et al.* (2015) Global liver gene  
549 expression differences in Nelore steers with divergent residual feed intake phenotypes.  
550 *BMC Genomics*, **16**, 1–14.
- 551 35. Pertea,M., Pertea,G.M., Antonescu,C.M., Chang,T.-C., Mendell,J.T. and Salzberg,S.L.  
552 (2015) StringTie enables improved reconstruction of a transcriptome from RNA-seq reads.  
553 *Nat. Biotechnol.*, **33**, 290–5.

- 554 36. Getnet,D., Grosso,J.F., Goldberg,M. V., Harris,T.J., Yen,H.R., Bruno,T.C., Durham,N.M.,  
555 Hipkiss,E.L., Pyle,K.J., Wada,S., *et al.* (2010) A role for the transcription factor Helios in  
556 human CD4+CD25+ regulatory T cells. *Mol. Immunol.*, **47**, 1595–1600.
- 557 37. Takatori,H., Kawashima,H., Matsuki,A., Meguro,K., Tanaka,S., Iwamoto,T., Sanayama,Y.,  
558 Nishikawa,N., Tamachi,T., Ikeda,K., *et al.* (2015) Helios enhances treg cell function in  
559 cooperation with FoxP3. *Arthritis Rheumatol.*, **67**, 1491–1502.
- 560 38. Asanuma,S., Yamagishi,M., Kawanami,K., Nakano,K., Sato-Otsubo,A., Muto,S., Sanada,M.,  
561 Yamochi,T., Kobayashi,S., Utsunomiya,A., *et al.* (2013) Adult T-cell leukemia cells are  
562 characterized by abnormalities of helios expression that promote T cell growth. *Cancer*  
563 *Sci.*, **104**, 1097–1106.
- 564 39. Schultz,D.C., Ayyanathan,K., Negorev,D., Maul,G.G. and Rauscher,F.J. (2002) SETDB1: A  
565 novel KAP-1-associated histone H3, lysine 9-specific methyltransferase that contributes to  
566 HP1-mediated silencing of euchromatic genes by KRAB zinc-finger proteins. *Genes Dev.*,  
567 **16**, 919–932.
- 568 40. Falandry,C., Fourel,G., Galy,V., Ristriani,T., Horard,B., Bensimon,E., Salles,G., Gilson,E.  
569 and Magdinier,F. (2010) CLLD8/KMT1F is a lysine methyltransferase that is important for  
570 chromosome segregation. *J. Biol. Chem.*, **285**, 20234–20241.
- 571 41. Gray,P. a, Fu,H., Luo,P., Zhao,Q., Yu,J., Ferrari,A., Tenzen,T., Yuk,D.-I., Tsung,E.F., Cai,Z.,  
572 *et al.* (2004) Mouse brain organization revealed through direct genome-scale TF  
573 expression analysis. *Science*, **306**, 2255–2257.
- 574 42. Charoensawan,V., Wilson,D. and Teichmann,S.A. (2010) Lineage-specific expansion of  
575 DNA-binding transcription factor families. *Trends Genet.*, **26**, 388–393.
- 576 43. Levine,M., Tjian,R. and Tjian,R. (2003) Transcription regulation and animal diversity.  
577 *Nature*, **424**, 147–151.
- 578 44. Schmitz,J.F., Zimmer,F. and Bornberg-Bauer,E. (2016) Mechanisms of transcription factor  
579 evolution in Metazoa. *Nucleic Acids Res.*, **44**, 6287–6297.
- 580 45. Simionato,E., Ledent,V., Richards,G., Thomas-Chollier,M., Kerner,P., Coornaert,D.,  
581 Degnan,B.M. and Vervoort,M. (2007) Origin and diversification of the basic helix-loop-helix  
582 gene family in metazoans: insights from comparative genomics. *BMC Evol. Biol.*, **7**, 33.
- 583 46. Degnan,B.M., Vervoort,M., Larroux,C. and Richards,G.S. (2009) Early evolution of  
584 metazoan transcription factors. *Curr. Opin. Genet. Dev.*, **19**, 591–599.
- 585 47. Lespinet,O., Wolf,Y.I., Koonin,E. V. and Aravind,L. (2002) The role of lineage-specific gene  
586 family expansion in the evolution of eukaryotes. *Genome Res.*, **12**, 1048–1059.
- 587 48. Freilich,S., Massingham,T., Bhattacharyya,S., Ponsting,H., Lyons,P. a, Freeman,T.C. and  
588 Thornton,J.M. (2005) Relationship between the tissue-specificity of mouse gene  
589 expression and the evolutionary origin and function of the proteins. *Genome Biol.*, **6**, R56.
- 590 49. Harhay,G.P., Smith,T.P., Alexander,L.J., Haudenschild,C.D., Keele,J.W., Matukumalli,L.K.,  
591 Schroeder,S.G., Van Tassell,C.P., Gresham,C.R., Bridges,S.M., *et al.* (2010) An atlas of  
592 bovine gene expression reveals novel distinctive tissue characteristics and evidence for  
593 improving genome annotation. *Genome Biol.*, **11**, R102.
- 594 50. Mutschler,M., Magin,A.S., Buerge,M., Roelz,R., Schanne,D.H., Will,B., Pilz,I.H.,  
595 Migliaccio,A.R. and Pahl,H.L. (2009) NF-E2 overexpression delays erythroid maturation  
596 and increases erythrocyte production. *Br. J. Haematol.*, **146**, 203–217.
- 597 51. Gothwal,M., Wehrle,J., Aumann,K., Zimmermann,V., Gr??nder,A. and Pahl,H.L. (2016) A  
598 novel role for nuclear factor-erythroid 2 in erythroid maturation by modulation of  
599 mitochondrial autophagy. *Haematologica*, **101**, 1054–1064.



- 600 52. Wan,F., Anderson,D.E., Barnitz,R.A., Snow,A., Bidere,N., Zheng,L., Hegde,V., Lam,L.T.,  
601 Staudt,L.M., Levens,D., *et al.* (2007) Ribosomal Protein S3: A KH Domain Subunit in NF-  
602 kB Complexes that Mediates Selective Gene Regulation. *Cell*, **131**, 927–939.
- 603 53. Groulx,I. and Lee,S. (2002) Oxygen-dependent ubiquitination and degradation of hypoxia-  
604 inducible factor requires nuclear-cytoplasmic trafficking of the von Hippel-Lindau tumor  
605 suppressor protein. *Mol. Cell. Biol.*, **22**, 5319–36.
- 606 54. Gustafsson,M. V., Zheng,X., Pereira,T., Gradin,K., Jin,S., Lundkvist,J., Ruas,J.L.,  
607 Poellinger,L., Lendahl,U. and Bondesson,M. (2005) Hypoxia requires Notch signaling to  
608 maintain the undifferentiated cell state. *Dev. Cell*, **9**, 617–628.

609

## 610 FIGURE LEGENDS

611 **Figure 1:** Identification of bovine TFs: 1. Update of the human TF reference repertoire (20); 2.  
612 Compilation of reliable DNA-binding domains (DBDs) as in Vaquerizas *et al.* (20), augmented  
613 by DBDs found in alternative human and mouse TF databases (AnimalTFDB (22), DBD (21),  
614 Cis-BP (23)); 3. Identification of putative bovine TFs using the list of reliable DBDs; 4. Manual  
615 curation of the putative bovine TFs by examining orthology to human TFs, protein function,  
616 experimental evidence and similarity of domain arrangement. Resulting high-confidence bovine  
617 TFs are divided in the evidence classes "a" and "b".

618

619 **Figure 2:** Classification of TFs according to their DNA-binding domain.

620

621 **Figure 3:** Heat map representation of the conservation of bovine TFs across 21 eukaryotic  
622 species. Rows represent the TFs and columns represent the species; both are hierarchically  
623 clustered according to the presence (green) or absence (white) of orthologues in the respective  
624 species. The color bar on the right indicates whether the TFs are predominantly present in  
625 mammals (pink), vertebrates (orange), Metazoans (yellow) or all analyzed eukaryotes (green).  
626

627 **Figure 4:** Heat map representation of (A) TF and (B) TcoF expression in 14 bovine tissues.  
628 Columns represent tissues clustered by their expression profile. Each row represents a TF in  
629 (A) and a TcoF in (B), where the color corresponds to the expression level (yellow for low  
630 expression, red for high expression, and white for not expressed).

631

632 **Figure 5:** Heat map representation of TF-TcoF coexpression in 14 bovine tissues (white blood  
633 cells, kidney, jejunum, liver, ampulla, pons, spleen, semitendinosus muscle, gallbladder,  
634 caruncular regions ipsilateral (car ips) to the corpeus luteum, mesenteric lymph nodes,  
635 caruncular regions contralateral (car con) to the corpeus luteum, heart, cerebral cortex.  
636 Columns represent tissues grouped by their expression profile. Each row represents a TF-TcoF  
637 pair.

638

## 639 SUPPLEMENTARY DATA

### 640 TABLE

641 **Supplementary Table S1: Updates on evidence for transcriptional activity.** TFs previously  
642 classified as "b" or "c" that were reclassified as "a" due to new evidence of transcriptional  
643 activity in the literature. The list contains accompanying information including: Ensembl gene  
644 IDs, human orthologue gene, orthology type, bovine TFs repertoire classification, Vaquerizas *et*  
645 *al.* (20) TF classification, literature references of experimental evidences.

646 **Supplementary Table S2:** List of Interpro DNA-binding domains and families used to  
647 characterise the bovine TFs repertoire.

648 **Supplementary Table S3: Bovine TFs with BLAST to "a" or "b" class human TF.** The list  
649 contains accompanying information including: Ensembl gene IDs, HGNC identifiers, bovine TFs  
650 repertoire classification, Vaquerizas *et al.* (20) TF classification, BLAST results.

- 651 **Supplementary Table S4: Final list of all genes analyzed and the bovine TFs**  
652 **classification.** List of genes classified as “a”, “b”, “c”, “x”, “y”. The list contains accompanying  
653 information including: Ensembl gene IDs, HGNC identifiers, human orthologue gene, orthology  
654 type and tissue expression if any.
- 655 **Supplementary Table S5: *Bos taurus* TcoF repertoire.** List of TcoF-encoding loci classified  
656 as “high-confident” or three “hypothetical” groups. The list contains accompanying information  
657 including: Ensembl gene IDs, HGNC identifiers, Uniprot IDs, human orthologue gene, orthology  
658 type, bovine transcription factor ID pair, reliability classification and TcoF tissue expression if  
659 any.
- 660 **Supplementary Table S6:** FPKM vs tissue for each TF expressed in at least one tissue.
- 661 **Supplementary Table S7:** FPKM vs tissue for each TcoF expressed in at least one tissue.
- 662 **Supplementary Table S8:** TF-TcoF Co-expression in 14 bovine tissues.
- 663
- 664 **FIGURE**
- 665 **Supplementary Figure S1:** Venn diagram comparing TFs from existing transcription factors  
666 (TFs) databases. **(a)** Human TFs from Vaquerizas *et al.* (20), Animal TFDB (22), DBD (21) and  
667 Cis-BP (23). **(b)** Mouse TFs from Cis-BP, DBD, and TFDB.
- 668 **Supplementary Figure S2:** Venn diagram comparing bovine TFs in our compendium with TFs  
669 listed for bovine in three existing TF databases: Animal TFDB (22), DBD (21) and Cis-BP (23).
- 670 **Supplementary Figure S3:** Heat map showing the conservation of bovine TFs without human  
671 orthologues across 20 eukaryotic species. Rows represent the TFs and columns the species;  
672 both are hierarchically clustered according to the presence (orange) or absence (white) of  
673 orthologues in the respective species. The color bar on the right indicates whether TFs are  
674 predominantly present in mammal (pink), vertebrate (orange), Metazoa (yellow) or all analyzed  
675 eukaryotes (green).
- 676 **Supplementary Figure S4: (A)** Number of TFs and TcoFs, independently determined to be  
677 expressed across all tissues. **(B)** Number of tissues in which TFs and TcoFs are independently  
678 determined to be expressed.

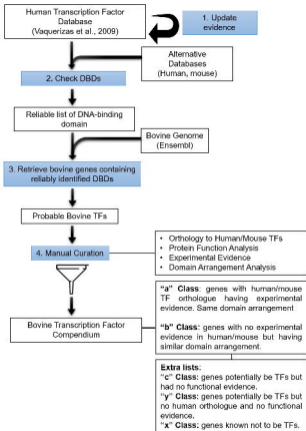

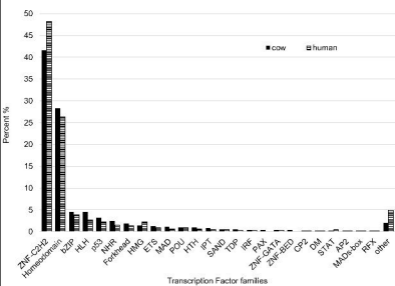

Mammals
  Vertebrates
  Metazoa
  Eukaryotes

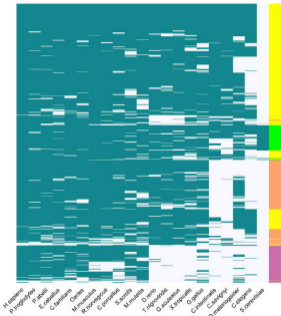

Transcription Factors



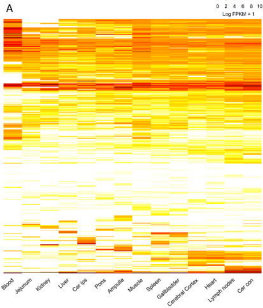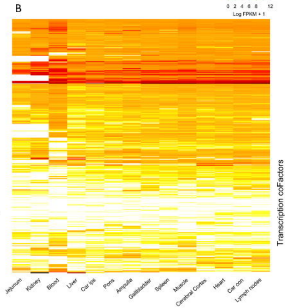

TF/TcoF expression TF expression TcoF expression None

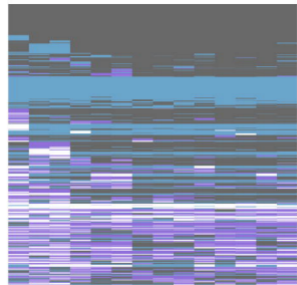

TF-TcoF pair

Blood Kidney Jejunum Liver Ampulla Pons Spleen Muscle Gallbladder Car lot Lymph nodes Car otn Heart Cerebral Cortex
